# Supplementary material
Source: PubMed Central journal article supplement (PMC6703245)
Supplement: Supp_Fig1.pdf [file Supp_Fig1.pdf]

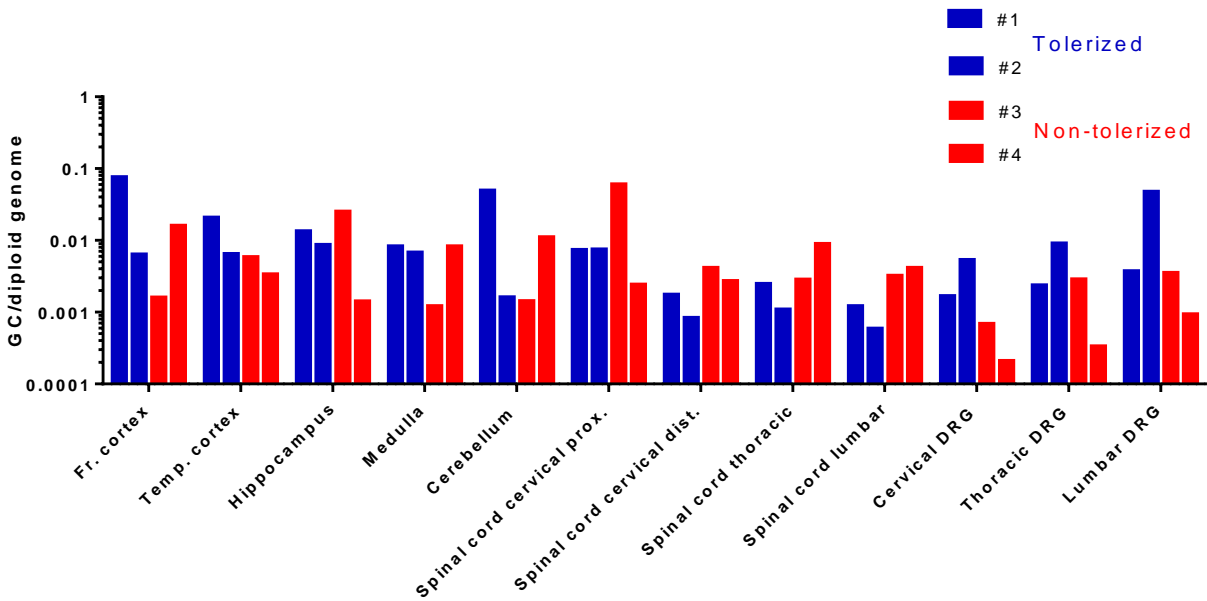

**Supplementary Figure S1. Vector genome biodistribution in CNS and PNS tissues.** Vector genome copy (GC) quantification by quantitative PCR in specimens collected at tissue harvest, three years and eight months post intrathecal vector administration in infant rhesus monkeys. Fr. Frontal, Temp. Temporal, prox. proximal, dist. Distal. Dotted line: limit of detection 0.0001 GC/dg.
