# Supplementary material
Source: PubMed Central journal article supplement (PMC6703245)
Supplement: Supp_Table1.pdf [file Supp_Table1.pdf]

## Supplementary Information

**Supplementary Figure S1. Vector genome biodistribution in CNS and PNS tissues.** Vector genome copy (GC) quantification by quantitative PCR in specimens collected at tissue harvest, three years and eight months post-intrathecal vector administration in infant rhesus monkeys. Fr. Frontal, Temp. Temporal, prox. proximal, dist. Distal. Dotted line: limit of detection 0.0001 GC/dg.

**Supplementary Table S1. Study design overview**

| Animal # | Day 1 (birth)                              | 1 month                                                | 1-9 months                               | 1-3 years             | 3 years 9 months                    |
|----------|--------------------------------------------|--------------------------------------------------------|------------------------------------------|-----------------------|-------------------------------------|
| 1 F      | AAV8.TBG.hIDUA<br>4.6x10 <sup>11</sup> GC* | AAV9.CB7.hIDUA<br>1.7x10 <sup>12</sup> GC <sup>†</sup> | Weekly to monthly blood and CSF sampling | Yearly blood sampling | Blood, CSF, PBMC, tissue collection |
| 2 M      | AAV8.TBG.hIDUA<br>3.8x10 <sup>11</sup> GC* | AAV9.CB7.hIDUA<br>1.8x10 <sup>12</sup> GC <sup>†</sup> |                                          |                       |                                     |
| 3 M      | AAV8.LSP.hFIX<br>4.7x10 <sup>11</sup> GC*  | AAV9.CB7.hIDUA<br>2.2x10 <sup>12</sup> GC <sup>†</sup> |                                          |                       |                                     |
| 4 M      | AAV8.LSP.hFIX<br>5x10 <sup>11</sup> GC*    | AAV9.CB7.hIDUA<br>2.1x10 <sup>12</sup> GC <sup>†</sup> |                                          |                       |                                     |

\* 1x10<sup>12</sup> GC/kg

<sup>†</sup> 3x10<sup>12</sup> GC/kg

GC=genome copies, CSF=cerebrospinal fluid, PBMC=peripheral blood mononuclear cells
