# Supplementary material
Source: PubMed Central journal article supplement (PMC6703245)
Supplement: Supp_Table2.pdf [file Supp_Table2.pdf]

**Supplementary Table S2. Animal #1 (Tolerized group) complete blood counts (CBCs).**

| <b>AAV8.TBG.hIDUA (IV) at birth; AAV9.CB7.hIDUA (intrathecal) at 4 weeks</b> |                          |       |         |         |         |         |          |          |          |          |          |                 |                  |                  |                  |
|------------------------------------------------------------------------------|--------------------------|-------|---------|---------|---------|---------|----------|----------|----------|----------|----------|-----------------|------------------|------------------|------------------|
| <b>#1 (F)</b>                                                                |                          | Birth | 2 weeks | 4 weeks | 5 weeks | 7 weeks | 2 months | 3 months | 4 months | 5 months | 6 months | 1 year 2 months | 2 years 4 months | 3 years 4 months | 3 years 9 months |
| <b>WBC</b>                                                                   | <b>10<sup>3</sup>/μL</b> | 6.0   | 6.5     | 4.1     | 7.3     | 6.1     | 9.9      | 8.4      | 13.9     | 6.4      | 10.6     | 7.5             | 8.6              | 12.3             | 5.3              |
| <b>RBC</b>                                                                   | <b>10<sup>3</sup>/μL</b> | 4.37  | 3.46    | 4.69    | 5.04    | 5.17    | 5.79     | 5.63     | 5.82     | 5.64     | 5.77     | 5.93            | 6.07             | 5.69             | 5.76             |
| <b>HgB</b>                                                                   | <b>g/dL</b>              | 14.3  | 10.0    | 11.9    | 12.5    | 12.7    | 13.8     | 13.4     | 13.5     | 13.3     | 13.6     | 13.6            | 14.0             | 13.2             | 14.1             |
| <b>HCT</b>                                                                   | <b>%</b>                 | 42.5  | 30.4    | 37.9    | 39.5    | 39.6    | 43.3     | 41.8     | 41.7     | 40.8     | 42.1     | 42.9            | 43.4             | 41.4             | 43.7             |
| <b>MCV</b>                                                                   | <b>fL / cell</b>         | 97    | 88      | 81      | 78      | 77      | 75       | 74       | 72       | 72       | 73       | 72              | 71               | 73               | 76               |
| <b>MCH</b>                                                                   | <b>pg/cell</b>           | 32.7  | 28.8    | 25.4    | 24.7    | 24.5    | 23.8     | 23.9     | 23.3     | 23.5     | 23.6     | 23.0            | 23.1             | 23.2             | 24.4             |
| <b>MCHC</b>                                                                  | <b>g/dL</b>              | 33.5  | 32.7    | 31.5    | 31.5    | 32.0    | 31.8     | 32.2     | 32.5     | 32.5     | 32.4     | 31.7            | 32.3             | 31.9             | 32.2             |
| <b>Platelets</b>                                                             | <b>10<sup>5</sup>/μL</b> | 3.83  | 10.47   | 6.47    | 6.81    | 5.56    | 6.11     | 6.39     | 6.81     | 6.33     | 6.50     | 4.26            | 4.56             | 5.93             | 4.93             |
| <b>Protein</b>                                                               | <b>mg/dL</b>             | 5.3   | 5.9     | 6.1     | 6.2     | 6.2     | 6.2      | 6.2      | 6.6      | 6.5      | 7.3      | 7.0             | 6.8              | 6.1              | 6.5              |
| <b>Fibrinogen</b>                                                            | <b>mg/dL</b>             | 200   | 200     | 400     | 400     | 100     | 200      | 200      | 300      | 300      | 200      | 300             | 300              | 300              | 200              |
| <b>Bands</b>                                                                 | <b>10<sup>0</sup>/μL</b> | 0     | 0       | 0       | 0       | 0       | 0        | 0        | 0        | 0        | 0        | 0               | 0                | 0                | 0                |
| <b>Neutrophils</b>                                                           | <b>10<sup>0</sup>/μL</b> | 3180  | 1755    | 246     | 584     | 183     | 1386     | 924      | 8618     | 1280     | 3922     | 4425            | 3612             | 7749             | 2915             |
| <b>Lymphocytes</b>                                                           | <b>10<sup>0</sup>/μL</b> | 2220  | 4420    | 3362    | 6278    | 5673    | 7128     | 6216     | 4726     | 4672     | 5830     | 3000            | 4472             | 3444             | 1961             |
| <b>Monocytes</b>                                                             | <b>10<sup>0</sup>/μL</b> | 480   | 195     | 410     | 219     | 122     | 990      | 756      | 278      | 64       | 636      | 75              | 258              | 615              | 159              |
| <b>Eosinophils</b>                                                           | <b>10<sup>0</sup>/μL</b> | 120   | 130     | 82      | 219     | 122     | 396      | 504      | 278      | 384      | 212      | 0               | 172              | 492              | 265              |
| <b>Basophils</b>                                                             | <b>10<sup>0</sup>/μL</b> | 0     | 0       | 0       | 0       | 0       | 0        | 0        | 0        | 0        | 0        | 0               | 86               | 0                | 0                |

WBC=White Blood Cells; RBC=Red Blood Cells; HgB=Hemoglobin; HCT=Hematocrit; MCV=Mean Corpuscular Volume; MCH=Mean Corpuscular Hemoglobin; MCHC=Mean Corpuscular Hemoglobin Concentration.
