# Supplementary material
Source: PubMed Central journal article supplement (PMC6703245)
Supplement: Supp_Table3.pdf [file Supp_Table3.pdf]

**Supplementary Table S3. Animal #2 (Tolerized group) CBCs**

| <b>AAV8.TBG.hIDUA (IV) at birth; AAV9.CB7.hIDUA (intrathecal) at 4 weeks</b> |                          |       |         |         |         |         |          |          |          |          |          |                 |                  |                  |                  |
|------------------------------------------------------------------------------|--------------------------|-------|---------|---------|---------|---------|----------|----------|----------|----------|----------|-----------------|------------------|------------------|------------------|
| <b>#2 (M)</b>                                                                |                          | Birth | 2 weeks | 4 weeks | 5 weeks | 7 weeks | 2 months | 3 months | 4 months | 5 months | 6 months | 1 year 2 months | 2 years 4 months | 3 years 4 months | 3 years 9 months |
| <b>WBC</b>                                                                   | <b>10<sup>3</sup>/μL</b> | 5.2   | 6.6     | 6.6     | 6.9     | 7.5     | 9.6      | 6.8      | 10.7     | 5.0      | 5.9      | 4.8             | 6.0              | 7.8              | 6.0              |
| <b>RBC</b>                                                                   | <b>10<sup>3</sup>/μL</b> | 4.43  | 3.27    | 4.89    | 5.17    | 9.36    | 5.79     | 5.52     | 5.51     | 5.24     | 5.06     | 5.01            | 5.34             | 5.11             | 5.17             |
| <b>HgB</b>                                                                   | <b>g/dL</b>              | 15.2  | 9.2     | 12.2    | 12.6    | 13.2    | 14.2     | 13.5     | 13.6     | 12.8     | 12.1     | 12.4            | 13.3             | 12.3             | 13.1             |
| <b>HCT</b>                                                                   | <b>%</b>                 | 46.3  | 29.2    | 39.3    | 40.4    | 41.7    | 44.1     | 41.9     | 41.8     | 39.5     | 37.6     | 38.1            | 40.5             | 38.8             | 40.3             |
| <b>MCV</b>                                                                   | <b>fL / cell</b>         | 104   | 89      | 80      | 78      | 78      | 76       | 76       | 76       | 75       | 74       | 76              | 76               | 76               | 78               |
| <b>MCH</b>                                                                   | <b>pg/cell</b>           | 34.4  | 28.3    | 25.0    | 24.4    | 24.6    | 24.5     | 24.5     | 24.7     | 24.5     | 24.0     | 24.7            | 24.9             | 24.1             | 25.3             |
| <b>MCHC</b>                                                                  | <b>g/dL</b>              | 33.0  | 31.7    | 31.2    | 31.7    | 31.6    | 32.2     | 32.3     | 32.7     | 32.5     | 32.3     | 32.4            | 32.8             | 31.7             | 32.5             |
| <b>Platelets</b>                                                             | <b>10<sup>5</sup>/μL</b> | 3.22  | 10.09   | 5.90    | 6.31    | 4.72    | 4.87     | 4.91     | 4.64     | 3.92     | 4.22     | 3.11            | 2.76             | 3.04             | 3.17             |
| <b>Plasma protein</b>                                                        | <b>mg/dL</b>             | 6.0   | 5.3     | 5.7     | 6.0     | 6.3     | 6.6      | 6.8      | 7.1      | 6.9      | 7.0      | 6.7             | 7.2              | 7.3              | 7.3              |
| <b>Fibrinogen</b>                                                            | <b>mg/dL</b>             | 200   | 200     | 300     | 200     | 200     | 300      | 300      | 300      | 400      | 100      | 100             | 200              | 300              | 200              |
| <b>Bands</b>                                                                 | <b>10<sup>0</sup>/μL</b> | 0     | 0       | 0       | 0       | 0       | 0        | 0        | 0        | 0        | 0        | 0               | 0                | 0                | 0                |
| <b>Neutrophils</b>                                                           | <b>10<sup>0</sup>/μL</b> | 1820  | 2178    | 1320    | 3243    | 975     | 3360     | 816      | 6955     | 1100     | 1121     | 2976            | 1560             | 3588             | 2160             |
| <b>Lymphocytes</b>                                                           | <b>10<sup>0</sup>/μL</b> | 3224  | 4092    | 5082    | 2967    | 5925    | 5952     | 5576     | 3317     | 3550     | 4543     | 1776            | 4200             | 3978             | 3540             |
| <b>Monocytes</b>                                                             | <b>10<sup>0</sup>/μL</b> | 156   | 330     | 132     | 483     | 300     | 192      | 272      | 214      | 50       | 118      | 48              | 120              | 234              | 120              |
| <b>Eosinophils</b>                                                           | <b>10<sup>0</sup>/μL</b> | 0     | 0       | 66      | 207     | 300     | 96       | 136      | 214      | 300      | 118      | 0               | 120              | 0                | 180              |
| <b>Basophils</b>                                                             | <b>10<sup>0</sup>/μL</b> | 0     | 0       | 0       | 0       | 0       | 0        | 0        | 0        | 0        | 0        | 0               | 0                | 0                | 0                |

WBC=White Blood Cells; RBC=Red Blood Cells; HgB=Hemoglobin; HCT=Hematocrit; MCV=Mean Corpuscular Volume; MCH=Mean Corpuscular Hemoglobin; MCHC=Mean Corpuscular Hemoglobin Concentration.
