# Supplementary material
Source: PubMed Central journal article supplement (PMC6703245)
Supplement: Supp_Table4.pdf [file Supp_Table4.pdf]

**Supplementary Table S4. Animal #3 (non-tolerized group) CBCs.**

| <b><i>AAV8.TBG.hFIX (IV) at birth; AAV9.CB7.hIDUA (intrathecal) at 4 weeks</i></b> |                          |       |         |         |         |         |          |          |          |          |          |                 |                  |                  |                  |
|------------------------------------------------------------------------------------|--------------------------|-------|---------|---------|---------|---------|----------|----------|----------|----------|----------|-----------------|------------------|------------------|------------------|
| <b>#3 (M)</b>                                                                      |                          | Birth | 2 weeks | 4 weeks | 5 weeks | 7 weeks | 2 months | 3 months | 4 months | 5 months | 6 months | 1 year 2 months | 2 years 4 months | 3 years 4 months | 3 years 9 months |
| <b>WBC</b>                                                                         | <b>10<sup>3</sup>/μL</b> | 4.0   | 7.5     | 5.4     | 5.5     | 12.1    | 11.8     | 10.3     | 11.8     | 6.8      | 9.2      | 5.2             | 10.4             | 7.2              | 7.0              |
| <b>RBC</b>                                                                         | <b>10<sup>3</sup>/μL</b> | 4.76  | 3.29    | 4.63    | 5.02    | 5.73    | 5.75     | 5.38     | 5.34     | 5.43     | 5.25     | 5.30            | 5.69             | 5.38             | 5.09             |
| <b>HgB</b>                                                                         | <b>g/dL</b>              | 14.6  | 8.5     | 10.3    | 11.3    | 13.0    | 13.0     | 12.3     | 12.1     | 12.5     | 12.0     | 12.3            | 13.5             | 12.4             | 12.0             |
| <b>HCT</b>                                                                         | <b>%</b>                 | 44.0  | 26.7    | 33.5    | 36.1    | 41.7    | 41.2     | 38.1     | 37.8     | 38.3     | 37.0     | 38.0            | 41.1             | 38.9             | 37.1             |
| <b>MCV</b>                                                                         | <b>fL / cell</b>         | 92    | 81      | 72      | 72      | 73      | 72       | 71       | 71       | 71       | 70       | 72              | 72               | 72               | 73               |
| <b>MCH</b>                                                                         | <b>pg/cell</b>           | 30.6  | 25.9    | 22.2    | 22.4    | 22.7    | 22.6     | 22.9     | 22.7     | 23.1     | 22.9     | 23.1            | 23.7             | 23.1             | 23.6             |
| <b>MCHC</b>                                                                        | <b>g/dL</b>              | 33.1  | 31.8    | 30.7    | 31.2    | 31.2    | 31.5     | 32.4     | 32.1     | 32.7     | 32.4     | 32.2            | 32.8             | 32.0             | 32.4             |
| <b>Platelets</b>                                                                   | <b>10<sup>5</sup>/μL</b> | 4.49  | 12.47   | 7.77    | 7.23    | 6.36    | 6.79     | 6.82     | 5.97     | 5.98     | 5.82     | 4.69            | 4.69             | 4.96             | 4.56             |
| <b>Plasma protein</b>                                                              | <b>mg/dL</b>             | 5.9   | 5.3     | 6.1     | 6.2     | 6.7     | 6.7      | 6.7      | 6.6      | 6.3      | 6.5      | 6.8             | 7.7              | 6.8              | 6.5              |
| <b>Fibrinogen</b>                                                                  | <b>mg/dL</b>             | 200   | 300     | 300     | 200     | 200     | 200      | 300      | 300      | 200      | 100      | 300             | 300              | 100              | 100              |
| <b>Bands</b>                                                                       | <b>10<sup>0</sup>/μL</b> | 0     | 0       | 0       | 0       | 0       | 0        | 0        | 0        | 0        | 0        | 0               | 0                | 0                | 0                |
| <b>Neutrophils</b>                                                                 | <b>10<sup>0</sup>/μL</b> | 1480  | 3075    | 324     | 990     | 7260    | 8142     | 3502     | 4484     | 1020     | 5152     | 1768            | 4680             | 2952             | 2520             |
| <b>Lymphocytes</b>                                                                 | <b>10<sup>0</sup>/μL</b> | 2160  | 4275    | 4860    | 3795    | 4477    | 3422     | 6386     | 6962     | 5100     | 3588     | 3224            | 5304             | 3672             | 4130             |
| <b>Monocytes</b>                                                                   | <b>10<sup>0</sup>/μL</b> | 280   | 75      | 54      | 330     | 242     | 118      | 206      | 236      | 272      | 276      | 208             | 208              | 504              | 350              |
| <b>Eosinophils</b>                                                                 | <b>10<sup>0</sup>/μL</b> | 80    | 75      | 162     | 385     | 121     | 118      | 206      | 118      | 340      | 184      | 0               | 208              | 72               | 0                |
| <b>Basophils</b>                                                                   | <b>10<sup>0</sup>/μL</b> | 0     | 0       | 0       | 0       | 0       | 0        | 0        | 0        | 68       | 0        | 0               | 0                | 0                | 0                |

WBC=White Blood Cells; RBC=Red Blood Cells; HgB=Hemoglobin; HCT=Hematocrit; MCV=Mean Corpuscular Volume; MCH=Mean Corpuscular Hemoglobin; MCHC=Mean Corpuscular Hemoglobin Concentration.
