# Supplementary material
Source: PubMed Central journal article supplement (PMC6703245)
Supplement: Supp_Table5.pdf [file Supp_Table5.pdf]

**Supplementary Table S5. Animal #4 (non-tolerized group) CBCs.**

| <b>AAV8.TBG.hFIX (IV) at birth; AAV9.CB7.hIDUA (intrathecal) at 4 weeks</b> |                          |       |         |         |         |         |          |          |          |          |          |                 |                  |                  |                  |
|-----------------------------------------------------------------------------|--------------------------|-------|---------|---------|---------|---------|----------|----------|----------|----------|----------|-----------------|------------------|------------------|------------------|
| <b>#4 (M)</b>                                                               |                          | Birth | 2 weeks | 4 weeks | 5 weeks | 7 weeks | 2 months | 3 months | 4 months | 5 months | 6 months | 1 year 2 months | 2 years 4 months | 3 years 4 months | 3 years 9 months |
| <b>WBC</b>                                                                  | <b>10<sup>3</sup>/μL</b> | 4.8   | 5.4     | 4.4     | 6.9     | 13.6    | 7.8      | 5.9      | 14.9     | 6.0      | 7.7      | 5.5             | 6.9              | 6.2              | 6.9              |
| <b>RBC</b>                                                                  | <b>10<sup>3</sup>/μL</b> | 4.58  | 3.86    | 4.87    | 5.23    | 5.48    | 5.33     | 5.53     | 5.05     | 5.68     | 5.72     | 5.58            | 5.96             | 5.58             | 5.48             |
| <b>HgB</b>                                                                  | <b>g/dL</b>              | 14.5  | 11.0    | 12.8    | 13.5    | 14.0    | 13.0     | 13.4     | 11.9     | 13.2     | 13.4     | 12.9            | 14.1             | 13.1             | 12.8             |
| <b>HCT</b>                                                                  | <b>%</b>                 | 43.9  | 34.2    | 40.5    | 42.6    | 43.9    | 41.2     | 41.6     | 37.3     | 41.8     | 41.8     | 41.2            | 43.8             | 41.6             | 40.9             |
| <b>MCV</b>                                                                  | <b>fL / cell</b>         | 96    | 89      | 83      | 81      | 80      | 77       | 75       | 74       | 73       | 73       | 74              | 74               | 75               | 75               |
| <b>MCH</b>                                                                  | <b>pg/cell</b>           | 31.6  | 28.6    | 26.2    | 25.9    | 25.5    | 24.4     | 24.2     | 23.5     | 23.3     | 23.5     | 23.1            | 23.7             | 23.5             | 23.4             |
| <b>MCHC</b>                                                                 | <b>g/dL</b>              | 33.0  | 32.3    | 31.6    | 31.8    | 31.8    | 31.5     | 32.1     | 31.8     | 31.7     | 32.2     | 31.4            | 32.2             | 31.5             | 31.4             |
| <b>Platelets</b>                                                            | <b>10<sup>5</sup>/μL</b> | 3.08  | 9.32    | 5.58    | 5.07    | 5.41    | 4.16     | 4.17     | 5.07     | 3.57     | 4.00     | 3.21            | 2.74             | 3.39             | 3.46             |
| <b>Plasma protein</b>                                                       | <b>mg/dL</b>             | 5.7   | 5.8     | 6.5     | 6.7     | 7.1     | 6.6      | 6.5      | 6.8      | 6.5      | 6.4      | 6.5             | 6.8              | 6.7              | 6.0              |
| <b>Fibrinogen</b>                                                           | <b>mg/dL</b>             | 200   | 400     | 300     | 200     | 100     | 300      | 200      | 300      | 200      | 100      | 100             | 200              | 300              | 200              |
| <b>Bands</b>                                                                | <b>10<sup>0</sup>/μL</b> | 0     | 0       | 0       | 0       | 0       | 0        | 0        | 0        | 0        | 0        | 0               | 0                | 0                | 0                |
| <b>Neutrophils</b>                                                          | <b>10<sup>0</sup>/μL</b> | 1200  | 2322    | 132     | 759     | 10880   | 3900     | 1298     | 9536     | 1560     | 2926     | 2640            | 1725             | 2232             | 2346             |
| <b>Lymphocytes</b>                                                          | <b>10<sup>0</sup>/μL</b> | 3264  | 2916    | 3960    | 5796    | 2584    | 3666     | 4189     | 4917     | 3840     | 4620     | 2860            | 4968             | 3410             | 4140             |
| <b>Monocytes</b>                                                            | <b>10<sup>0</sup>/μL</b> | 192   | 54      | 44      | 69      | 136     | 78       | 118      | 298      | 120      | 77       | 0               | 69               | 310              | 345              |
| <b>Eosinophils</b>                                                          | <b>10<sup>0</sup>/μL</b> | 144   | 108     | 264     | 276     | 0       | 156      | 295      | 149      | 480      | 77       | 0               | 138              | 248              | 69               |
| <b>Basophils</b>                                                            | <b>10<sup>0</sup>/μL</b> | 0     | 0       | 0       | 0       | 0       | 0        | 0        | 0        | 0        | 0        | 0               | 0                | 0                | 0                |

WBC=White Blood Cells; RBC=Red Blood Cells; HgB=Hemoglobin; HCT=Hematocrit; MCV=Mean Corpuscular Volume; MCH=Mean Corpuscular Hemoglobin; MCHC=Mean Corpuscular Hemoglobin Concentration.
