# Supplementary material
Source: PubMed Central journal article supplement (PMC6703245)
Supplement: Supp_Table6.pdf [file Supp_Table6.pdf]

**Supplementary Table S6. Animal #1 (tolerized group) clinical chemistry panels.**

| <b>AAV8.TBG.hIDUA (IV) at birth; AAV9.CB7.hIDUA (intrathecal) at 4 weeks</b> |        |       |         |          |          |          |          |          |          |          |          |                 |                  |                  |                  |
|------------------------------------------------------------------------------|--------|-------|---------|----------|----------|----------|----------|----------|----------|----------|----------|-----------------|------------------|------------------|------------------|
| <b>#1 (F)</b>                                                                |        | Birth | 4 weeks | 2 months | 3 months | 4 months | 5 months | 6 months | 7 months | 8 months | 9 months | 1 year 2 months | 2 years 4 months | 3 years 4 months | 3 years 9 months |
| <b>Na</b>                                                                    | mmol/L | 144   | 145     | 143      | 141      | 139      | 144      | 145      | 143      | 145      | 144      | 148             | 148              | 150              | 148              |
| <b>K</b>                                                                     | mmol/L | 3.4   | 5.1     | 4.5      | 4.0      | 4.2      | 4.1      | 3.7      | 3.8      | 3.9      | 3.7      | 3.7             | 3.9              | 4.0              | 4.1              |
| <b>Cl</b>                                                                    | mmol/L | 111   | 112     | 108      | 110      | 109      | 108      | 107      | 109      | 110      | 112      | 115             | 112              | 111              | 112              |
| <b>Total CO2</b>                                                             | mEq/L  | 24    | 19      | 16       | 17       | 15       | 23       | 22       | 20       | 22       | 18       | 22              | 24               | 25               | 21               |
| <b>anion Gap</b>                                                             | mEq/L  | 12    | 19      | 24       | 18       | 19       | 17       | 20       | 18       | 17       | 18       | 15              | 16               | 18               | 19               |
| <b>P</b>                                                                     | mg/dL  | 6.2   | 8.4     | 7.6      | 7.3      | 7.4      | 7.5      | 7.5      | 6.7      | 7.4      | 6.9      | 6.2             | 5.8              | 5.6              | 6.6              |
| <b>Ca</b>                                                                    | mg/dL  | 9.4   | 9.6     | 10.5     | 10.0     | 9.8      | 10.4     | 10.1     | 10.5     | 10.0     | 10.1     | 9.2             | 9.5              | 9.0              | 9.6              |
| <b>BUN</b>                                                                   | mg/dL  | 14    | 3       | 9        | 9        | 17       | 8        | 6        | 6        | 15       | 20       | 18              | 16               | 21               | 17               |
| <b>Crea</b>                                                                  | mg/dL  | 0.6   | 0.3     | 0.3      | 0.3      | 0.3      | 0.3      | 0.3      | 0.4      | 0.4      | 0.4      | 0.4             | 0.5              | 0.6              | 0.5              |
| <b>Gluc</b>                                                                  | mg/dL  | 32    | 77      | 42       | 57       | 63       | 81       | 99       | 70       | 62       | 51       | 66              | 65               | 62               | 69               |
| <b>TPro</b>                                                                  | g/dL   | 4.8   | 4.6     | 5.1      | 5.0      | 5.2      | 5.5      | 5.7      | 6.2      | 6.1      | 6.2      | 6.1             | 5.8              | 5.4              | 5.9              |
| <b>Alb</b>                                                                   | g/dL   | 3.4   | 2.9     | 3.7      | 3.8      | 3.4      | 3.9      | 4.0      | 4.2      | 4.1      | 4.5      | 3.9             | 3.3              | 3.1              | 3.7              |
| <b>ALT</b>                                                                   | U/L    | 3     | 17      | 21       | 21       | 13       | 20       | 24       | 19       | 17       | 20       | 21              | 30               | 22               | 20               |
| <b>AST</b>                                                                   | U/L    | 11    | 39      | 27       | 23       | 30       | 39       | 32       | 28       | 27       | 26       | 19              | 27               | 21               | 18               |
| <b>CPK</b>                                                                   | U/L    | 38    | 642     | 290      | 259      | 701      | 978      | 191      | 796      | 600      | 529      | 182             | 407              | 401              | 252              |
| <b>ALK</b>                                                                   | U/L    | 206   | 930     | 1059     | 970      | 952      | 1029     | 1144     | 824      | 775      | 740      | 532             | 288              | 217              | 317              |
| <b>GGT</b>                                                                   | U/L    | 62    | 118     | 120      | 117      | 89       | 120      | 115      | 83       | 78       | 81       | 63              | 45               | 36               | 48               |
| <b>LDH</b>                                                                   | U/L    | 180   | 809     | 312      | 282      | 396      | 478      | 411      | 364      | 363      | 336      | 259             | 231              | 356              | 210              |
| <b>Chol</b>                                                                  | mg/dL  | 77    | 117     | 116      | 135      | 100      | 131      | 124      | 152      | 155      | 182      | 178             | 153              | 167              | 135              |
| <b>Tri</b>                                                                   | mg/dL  | 10    | 53      | 72       | 79       | 99       | 69       | 100      | 65       | 60       | 39       | 56              | 70               | 88               | 46               |
| <b>Tbil</b>                                                                  | mg/dL  | 0.6   | 0.2     | 0.2      | 0.1      | 0.1      | 0.1      | 0.1      | 0.1      | 0.2      | 0.2      | 0.1             | 0.1              | 0.1              | 0.1              |
| <b>DirBil</b>                                                                | mg/dL  | 0.3   | 0.1     | 0.0      | 0.0      | 0.0      | 0.0      | 0.0      | 0.0      | 0.0      | 0.0      | 0.0             | 0.0              | 0.0              | 0.0              |

Na=Sodium; K=Potassium; Cl=Chloride; P=Phosphorus; BUN=Blood Urea Nitrogen; Crea=Creatinine; Gluc=Glucose; TP=Total Protein; Alb=Albumin; ALT=Alanine aminotransferase; AST=Aspartate aminotransferase; CPK=Creatine phosphokinase; ALK=Alkaline phosphatase; GGT=Gamma-glutamyl transferase; LDH=lactate dehydrogenase; Chol=cholesterol; Tri=triglycerides; Tbil=Total bilirubin; DirBil=Direct bilirubin.
