# Supplementary material
Source: PubMed Central journal article supplement (PMC6703245)
Supplement: Supp_Table7.pdf [file Supp_Table7.pdf]

**Supplementary Table S7. Animal #2 (tolerized group) clinical chemistry panels.**

| <b>AAV8.TBG.hIDUA (IV) at birth; AAV9.CB7.hIDUA (intrathecal) at 4 weeks</b> |        |       |         |          |          |          |          |          |          |          |          |                 |                  |                  |                  |
|------------------------------------------------------------------------------|--------|-------|---------|----------|----------|----------|----------|----------|----------|----------|----------|-----------------|------------------|------------------|------------------|
| <b>#2 (M)</b>                                                                |        | Birth | 4 weeks | 2 months | 3 months | 4 months | 5 months | 6 months | 7 months | 8 months | 9 months | 1 year 2 months | 2 years 4 months | 3 years 4 months | 3 years 9 months |
| <b>Na</b>                                                                    | mmol/L | 147   | 147     | 144      | 144      | 142      | 144      | 144      | 144      | 143      | 144      | 146             | 147              | 149              | 143              |
| <b>K</b>                                                                     | mmol/L | 5.1   | 4.7     | 4.0      | 4.2      | 3.5      | 3.3      | 3.2      | 3.6      | 3.5      | 3.7      | 3.5             | 3.5              | 3.7              | 4.4              |
| <b>Cl</b>                                                                    | mmol/L | 111   | 112     | 108      | 109      | 106      | 109      | 107      | 108      | 107      | 110      | 110             | 107              | 108              | 105              |
| <b>Total CO2</b>                                                             | mEq/L  | 22    | 20      | 16       | 18       | 19       | 26       | 25       | 21       | 24       | 20       | 20              | 25               | 23               | 25               |
| <b>anion Gap</b>                                                             | mEq/L  | 19    | 20      | 24       | 21       | 21       | 12       | 15       | 19       | 16       | 18       | 20              | 19               | 22               | 17               |
| <b>P</b>                                                                     | mg/dL  | 4.8   | 8.5     | QNS      | 6.8      | 5.6      | 5.4      | 5.7      | 7.2      | 5.3      | 5.7      | 5.8             | 5.1              | 5.1              | 4.1              |
| <b>Ca</b>                                                                    | mg/dL  | 9.8   | 9.5     | 9.6      | 9.9      | 9.5      | 10.0     | 9.4      | 9.8      | 9.9      | 9.7      | 9.4             | 10.0             | 9.6              | 10.6             |
| <b>BUN</b>                                                                   | mg/dL  | 44    | 3       | 14       | 11       | 25       | 8        | 11       | 12       | 16       | 22       | 21              | 25               | 27               | 33               |
| <b>Crea</b>                                                                  | mg/dL  | 1.2   | 0.2     | 0.3      | 0.4      | 0.4      | 0.3      | 0.3      | 0.4      | 0.4      | 0.4      | 0.5             | 0.5              | 0.6              | 0.9              |
| <b>Gluc</b>                                                                  | mg/dL  | 55    | 80      | 42       | 74       | 63       | 104      | 73       | 84       | 79       | 60       | 81              | 78               | 67               | 100              |
| <b>TPro</b>                                                                  | g/dL   | 5.4   | 4.2     | 5.2      | 5.4      | 5.8      | 5.7      | 5.5      | 5.8      | 6.2      | 6.4      | 6.1             | 6.1              | 6.6              | 6.5              |
| <b>Alb</b>                                                                   | g/dL   | 3.7   | 2.6     | 3.9      | 4.1      | 3.8      | 4.1      | 3.9      | 4.1      | 4.2      | 4.6      | 4.2             | 4.0              | 4.3              | 4.3              |
| <b>ALT</b>                                                                   | U/L    | 20    | 26      | 25       | 24       | 16       | 23       | 20       | 23       | 25       | 27       | 29              | 45               | 50               | 38               |
| <b>AST</b>                                                                   | U/L    | 30    | 33      | 30       | 25       | 26       | 32       | 34       | 35       | 27       | 31       | 29              | 38               | 36               | 31               |
| <b>CPK</b>                                                                   | U/L    | 19*   | 182     | 241      | 229      | 244      | 252      | 652      | 421      | 249      | 209      | 306             | 595              | 529              | 212              |
| <b>ALK</b>                                                                   | U/L    | 611   | 1658    | 1431     | 1546     | 858      | 1280     | 1180     | 1209     | 1075     | 903      | 723             | 603              | 641              | 458              |
| <b>GGT</b>                                                                   | U/L    | 187   | 240     | 146      | 148      | 103      | 130      | 125      | 122      | 101      | 100      | 83              | 89               | 90               | 64               |
| <b>LDH</b>                                                                   | U/L    | 354   | 314     | 298      | 253      | 228      | 292      | 236      | 334      | 278      | 318      | 229             | 216              | 210              | 191              |
| <b>Chol</b>                                                                  | mg/dL  | 81    | 195     | 183      | 201      | 123      | 147      | 139      | 158      | 164      | 198      | 190             | 161              | 163              | 154              |
| <b>Tri</b>                                                                   | mg/dL  | 16    | 71      | 61       | 50       | 140      | 80       | 83       | 56       | 120      | 61       | 63              | 70               | 72               | 66               |
| <b>Tbil</b>                                                                  | mg/dL  | 0.6   | 0.3     | 0.2      | 0.2      | 0.2      | 0.1      | 0.1      | 0.2      | 0.2      | 0.2      | 0.2             | 0.1              | 0.2              | 0.1              |
| <b>DirBil</b>                                                                | mg/dL  | 0.2   | 0.1     | 0.0      | 0.0      | 0.0      | 0.0      | 0.0      | 0.0      | 0.0      | 0.0      | 0.0             | 0.0              | 0.0              | 0.0              |

Na=Sodium; K=Potassium; Cl=Chloride; P=Phosphorus; BUN=Blood Urea Nitrogen; Crea=Creatinine; Gluc=Glucose; TP=Total Protein; Alb=Albumin; ALT=Alanine aminotransferase; AST=Aspartate aminotransferase; CPK=Creatine phosphokinase; ALK=Alkaline phosphatase; GGT=Gamma-glutamyl transferase; LDH=lactate dehydrogenase; Chol=cholesterol; Tri=triglycerides; Tbil=Total bilirubin; DirBil=Direct bilirubin
