# Supplementary material
Source: PubMed Central journal article supplement (PMC6703245)
Supplement: Supp_Table8.pdf [file Supp_Table8.pdf]

**Supplementary Table S8. Animal #3 (non-tolerized group) clinical chemistry panels.**

| <b>AAV8.TBG.hFIX (IV) at birth; AAV9.CB7.hIDUA (intrathecal) at 4 weeks</b> |        |       |         |          |          |          |          |          |          |          |          |                 |                  |                  |                  |
|-----------------------------------------------------------------------------|--------|-------|---------|----------|----------|----------|----------|----------|----------|----------|----------|-----------------|------------------|------------------|------------------|
| <b>#3 (M)</b>                                                               |        | Birth | 4 weeks | 2 months | 3 months | 4 months | 5 months | 6 months | 7 months | 8 months | 9 months | 1 year 2 months | 2 years 4 months | 3 years 4 months | 3 years 9 months |
| <b>Na</b>                                                                   | mmol/L | 142   | 146     | 148      | 143      | 143      | 142      | 146      | 141      | 143      | 143      | 146             | 149              | 149              | 146              |
| <b>K</b>                                                                    | mmol/L | 5.0   | 4.7     | 5.2      | 4.6      | 3.1      | 3.5      | 3.3      | 3.9      | 3.4      | 3.4      | 3.3             | 3.5              | 4.1              | 3.8              |
| <b>Cl</b>                                                                   | mmol/L | 109   | 112     | 110      | 108      | 109      | 108      | 110      | 109      | 106      | 107      | 109             | 106              | 111              | 108              |
| <b>Total CO2</b>                                                            | mEq/L  | 21    | 21      | 15       | 15       | 21       | 22       | 23       | 21       | 19       | 16       | 21              | 15               | 22               | 25               |
| <b>anion Gap</b>                                                            | mEq/L  | 17    | 18      | 28       | 25       | 16       | 16       | 16       | 15       | 21       | 23       | 19              | 32               | 20               | 17               |
| <b>P</b>                                                                    | mg/dL  | 6.8   | 7.5     | 8.0      | 6.4      | 4.5      | 6.1      | 5.0      | 4.9      | 5.7      | 8.2      | 6.1             | 5.4              | 6.3              | 6.2              |
| <b>Ca</b>                                                                   | mg/dL  | 9.9   | 9.7     | 10.1     | 9.6      | 9.9      | 9.7      | 9.8      | 9.6      | 10.1     | 9.2      | 9.4             | 9.9              | 9.7              | 9.7              |
| <b>BUN</b>                                                                  | mg/dL  | 12    | 3*      | 23       | 13       | 14       | 6        | 11       | 15       | 23       | 40       | 21              | 24               | 23               | 19               |
| <b>Crea</b>                                                                 | mg/dL  | 0.6   | 0.2     | 0.4      | 0.4      | 0.3      | 0.3      | 0.3      | 0.3      | 0.4      | 0.4      | 0.4             | 0.5              | 0.5              | 0.6              |
| <b>Gluc</b>                                                                 | mg/dL  | 34    | 77      | 22       | 47       | 78       | 82       | 72       | 73       | 76       | 54       | 78              | 83               | 60               | 67               |
| <b>TPro</b>                                                                 | g/dL   | 5.0   | 4.9     | 5.7      | 5.5      | 5.6      | 5.3      | 5.4      | 5.9      | 6.4      | 6.2      | 6.0             | 6.5              | 6.3              | 6.0              |
| <b>Alb</b>                                                                  | g/dL   | 3.5   | 2.8     | 3.8      | 3.9      | 3.5      | 3.7      | 3.7      | 4.0      | 4.2      | 4.4      | 4.0             | 4.1              | 4.0              | 3.9              |
| <b>ALT</b>                                                                  | U/L    | 5     | 11      | 15       | 13       | 14       | 15       | 14       | 23       | 20       | 20       | 26              | 30               | 27               | 21               |
| <b>AST</b>                                                                  | U/L    | 13    | 18      | 26       | 26       | 24       | 23       | 22       | 41       | 30       | 44       | 29              | 30               | 30               | 22               |
| <b>CPK</b>                                                                  | U/L    | 31    | 181     | 202      | 579      | 209      | 245      | 210      | 533      | 377      | 369      | 382             | 448              | 461              | 390              |
| <b>ALK</b>                                                                  | U/L    | 395   | 1132    | 1559     | 1612     | 1564     | 1699     | 1360     | 1430     | 1115     | 1226     | 835             | 474              | 746              | 837              |
| <b>GGT</b>                                                                  | U/L    | 59    | 117     | 111      | 104      | 89       | 105      | 94       | 82       | 80       | 83       | 77              | 67               | 76               | 72               |
| <b>LDH</b>                                                                  | U/L    | 227   | 298     | 395      | 367      | 333      | 329      | 317      | 564      | 370      | 470      | 302             | 274              | 282              | 320              |
| <b>Chol</b>                                                                 | mg/dL  | 50    | 120     | 119      | 118      | 103      | 113      | 105      | 120      | 137      | 151      | 142             | 156              | 134              | 115              |
| <b>Tri</b>                                                                  | mg/dL  | 24    | 43      | 75       | 80       | 97       | 88       | 60       | 43       | 81       | 57       | 54              | 81               | 80               | 75               |
| <b>Tbil</b>                                                                 | mg/dL  | 0.6   | 0.2     | 0.2      | 0.3      | 0.1      | 0.1      | 0.1      | 0.2      | 0.2      | 0.2      | 0.2             | 0.1              | 0.2              | 0.1              |
| <b>DirBil</b>                                                               | mg/dL  | 0.3   | 0.1     | 0.0      | 0.1      | 0.0      | 0.0      | 0.0      | 0.0      | 0.0      | 0.0      | 0.0             | 0.0              | 0.0              | 0.0              |

Na=Sodium; K=Potassium; Cl=Chloride; P=Phosphorus; BUN=Blood Urea Nitrogen; Crea=Creatinine; Gluc=Glucose; TP=Total Protein; Alb=Albumin; ALT=Alanine aminotransferase; AST=Aspartate aminotransferase; CPK=Creatine phosphokinase; ALK=Alkaline phosphatase; GGT=Gamma-glutamyl transferase; LDH=lactate dehydrogenase; Chol=cholesterol; Tri=triglycerides; Tbil=Total bilirubin; DirBil=Direct bilirubin
