# Supplementary material
Source: PubMed Central journal article supplement (PMC6703245)
Supplement: Supp_Table9.pdf [file Supp_Table9.pdf]

**Supplementary Table S9. Animal #4 (non-tolerized group) clinical chemistry panels.**

| <i>AAV8.TBG.hFIX (IV) at birth; AAV9.CB7.hIDUA (intrathecal) at 4 weeks</i> |        |       |         |          |          |          |          |          |          |          |          |                 |                  |                  |                  |
|-----------------------------------------------------------------------------|--------|-------|---------|----------|----------|----------|----------|----------|----------|----------|----------|-----------------|------------------|------------------|------------------|
| <b>#4 (M)</b>                                                               |        | Birth | 4 weeks | 2 months | 3 months | 4 months | 5 months | 6 months | 7 months | 8 months | 9 months | 1 year 2 months | 2 years 4 months | 3 years 4 months | 3 years 9 months |
| <b>Na</b>                                                                   | mmol/L | 141   | 145     | 145      | 144      | 143      | 145      | 147      | 142      | 146      | 144      | 145             | 146              | 150              | 147              |
| <b>K</b>                                                                    | mmol/L | 3.7   | 4.2     | 5.3      | 4.1      | 3.3      | 3.4      | 3.1      | 3.5      | 3.1      | 3.1      | 3.3             | 3.6              | 3.7              | 4.0              |
| <b>Cl</b>                                                                   | mmol/L | 107   | 109     | 109      | 109      | 106      | 109      | 106      | 108      | 104      | 109      | 108             | 107              | 109              | 107              |
| <b>Total CO2</b>                                                            | mEq/L  | 26    | 19      | 13       | 15       | 18       | 23       | 26       | 19       | 21       | 14       | 23              | 20               | 24               | 28               |
| <b>anion Gap</b>                                                            | mEq/L  | 12    | 21      | 28       | 24       | 22       | 16       | 18       | 19       | 24       | 24       | 17              | 23               | 21               | 16               |
| <b>P</b>                                                                    | mg/dL  | 5.8   | 7.0     | 6.7      | 5.8      | 5.5      | 6.2      | 6.1      | 5.1      | 5.6      | 6.4      | 6.7             | 6.0              | 7.7              | 5.6              |
| <b>Ca</b>                                                                   | mg/dL  | 9.4   | 10.0    | 9.9      | 9.7      | 9.9      | 9.7      | 9.6      | 9.8      | 10.2     | 9.7      | 8.9             | 9.7              | 9.5              | 10.0             |
| <b>BUN</b>                                                                  | mg/dL  | 13    | 8       | 22       | 14       | 24       | 10       | 11       | 22       | 26       | 35       | 21              | 29               | 23               | 26               |
| <b>Crea</b>                                                                 | mg/dL  | 0.6   | 0.4     | 0.3      | 0.3      | 0.3      | 0.3      | 0.3      | 0.4      | 0.4      | 0.4      | 0.4             | 0.5              | 0.6              | 0.6              |
| <b>Gluc</b>                                                                 | mg/dL  | 31    | 74      | 51       | 72       | 80       | 83       | 73       | 63       | 69       | 62       | 70              | 79               | 62               | 77               |
| <b>TPro</b>                                                                 | g/dL   | 5.0   | 5.4     | 5.5      | 5.5      | 5.6      | 5.4      | 5.4      | 5.8      | 6.4      | 6.0      | 5.8             | 5.9              | 6.0              | 5.3              |
| <b>Alb</b>                                                                  | g/dL   | 3.5   | 3.4     | 4.0      | 4.1      | 3.9      | 3.9      | 4.0      | 4.2      | 4.5      | 4.5      | 4.0             | 3.9              | 4.1              | 3.7              |
| <b>ALT</b>                                                                  | U/L    | 3     | 26      | 22       | 16       | 17       | 18       | 14       | 21       | 19       | 19       | 21              | 24               | 21               | 23               |
| <b>AST</b>                                                                  | U/L    | 15    | 26      | 45       | 26       | 29       | 28       | 30       | 30       | 28       | 36       | 23              | 24               | 22               | 22               |
| <b>CPK</b>                                                                  | U/L    | 39    | 266     | 425      | 245      | 162      | 288      | 823      | 294      | 538      | 801      | 111             | 206              | 250              | 209              |
| <b>ALK</b>                                                                  | U/L    | 399   | 945     | 1118     | 1140     | 1167     | 1274     | 1260     | 1075     | 782      | 806      | 734             | 497              | 695              | 563              |
| <b>GGT</b>                                                                  | U/L    | 72    | 133     | 106      | 113      | 97       | 108      | 101      | 88       | 73       | 78       | 84              | 69               | 85               | 72               |
| <b>LDH</b>                                                                  | U/L    | 247   | 283     | 703      | 298      | 310      | 319      | 259      | 284      | 264      | 310      | 224             | 217              | 206              | 226              |
| <b>Chol</b>                                                                 | mg/dL  | 67    | 119     | 149      | 139      | 125      | 126      | 127      | 144      | 170      | 166      | 153             | 170              | 142              | 136              |
| <b>Tri</b>                                                                  | mg/dL  | 15    | 44      | 67       | 64       | 88       | 83       | 72       | 53       | 51       | 67       | 56              | 96               | 91               | 73               |
| <b>Tbil</b>                                                                 | mg/dL  | 0.6   | 0.1     | 0.2      | 0.2      | 0.2      | 0.1      | 0.1      | 0.2      | 0.1      | 0.2      | 0.2             | 0.1              | 0.2              | 0.1              |
| <b>DirBil</b>                                                               | mg/dL  | 0.3   | 0.0     | 0.0      | 0.0      | 0.0      | 0.0      | 0.0      | 0.0      | 0.0      | 0.0      | 0.0             | 0.0              | 0.0              | 0.0              |

Na=Sodium; K=Potassium; Cl=Chloride; P=Phosphorus; BUN=Blood Urea Nitrogen; Crea=Creatinine; Gluc=Glucose; TP=Total Protein; Alb=Albumin; ALT=Alanine aminotransferase; AST=Aspartate aminotransferase; CPK=Creatine phosphokinase; ALK=Alkaline phosphatase; GGT=Gamma-glutamyl transferase; LDH=lactate dehydrogenase; Chol=cholesterol; Tri=triglycerides; Tbil=Total bilirubin; DirBil=Direct bilirubin
