# Supplementary material
Source: PubMed Central journal article supplement (PMC6703245)
Supplement: Supp_Table10.pdf [file Supp_Table10.pdf]

**Supplementary Table S10. Coagulation times at tissue harvest.**

| <u>Group</u>              | <u>Animal #</u> | <u>Age</u>       | <u>PT</u> | <u>APTT</u> |
|---------------------------|-----------------|------------------|-----------|-------------|
| AAV8.hIDUA(IV)/AAV9.hIDUA | #1 (F)          | 3 years 9 months | 13.4      | 22.3        |
|                           | #2 (M)          | 3 years 9 months | 12.5      | 24.0        |
| AAV8.hFIX(IV)/AAV9.hIDUA  | #3 (M)          | 3 years 9 months | 12.4      | 21.2        |
|                           | #4 (M)          | 3 years 9 months | 12.0      | 20.3        |
