# Supplementary material
Source: PubMed Central journal article supplement (PMC6703245)
Supplement: Supp_Table11.pdf [file Supp_Table11.pdf]

**Supplementary Table S11. CSF analysis at tissue harvest.**

| Group                     | AAV8.hIDUA(IV)/AAV9.hIDUA (intrathecal)                              |                               | AAV8.hFIX(IV)/AAV9.hIDUA (intrathecal)                             |                                                        |
|---------------------------|----------------------------------------------------------------------|-------------------------------|--------------------------------------------------------------------|--------------------------------------------------------|
|                           | #1 (F)                                                               | #2 (M)                        | #3 (M)                                                             | #4 (M)                                                 |
| Animal #                  | #1 (F)                                                               | #2 (M)                        | #3 (M)                                                             | #4 (M)                                                 |
| Age                       | 3 years 9 months                                                     | 3 years 9 months              | 3 years 9 months                                                   | 3 years 9 months                                       |
| Appearance                | Slightly Pink, Hazy                                                  | Clear, Colorless              | Clear, Colorless                                                   | Red, Cloudy                                            |
| Refractive Index          | 1.3348                                                               | 1.3348                        | 1.3348                                                             | 1.3350                                                 |
| Total Protein (mg/dl)     | 18                                                                   | 28                            | 24                                                                 | 88                                                     |
| Glucose (mg/dl)           | 49                                                                   | 59                            | 47                                                                 | 73                                                     |
| WBC Count (cells/ul)      | 10                                                                   | 3                             | 7                                                                  | 30                                                     |
| RBC Count (cells/ul)      | 4,580                                                                | 170                           | 56                                                                 | 100,000                                                |
| Segmented Neutrophils (%) | 39                                                                   | 0                             | 0                                                                  | 26                                                     |
| Lymphocytes (%)           | 30                                                                   | 68                            | 56                                                                 | 70                                                     |
| Monocytes/Macrophage (%)  | 30                                                                   | 32                            | 44                                                                 | 3                                                      |
| Eosinophil (%)            | 1                                                                    | 0                             | 0                                                                  | 1                                                      |
| Comments                  | Moderate RBC's seen;<br>Sample contaminated<br>with peripheral blood | Small amount of RBC's<br>seen | Marked RBC's seen;<br>Sample contaminated<br>with peripheral blood | Total protein<br>result verified by<br>repeat analysis |
