# Supplementary material
Source: PubMed Central journal article supplement (PMC6703245)
Supplement: Supp_Table12.pdf [file Supp_Table12.pdf]

**Supplementary Table S12. IDUA enzyme activity in the CSF from four weeks of age (prior to intrathecal administration) to three years and nine months of age.**

|                  | #1        | #2    | #3            | #4   |
|------------------|-----------|-------|---------------|------|
|                  | Tolerized |       | Non-tolerized |      |
| 4 weeks          | 3.1       | 12.3  | 14.4          | 4.6  |
| 5 weeks          | 41.0      | 30.4  | 36.8          | 46.5 |
| 7 weeks          | 54.4      | 59.8  | 172.1         | 11.3 |
| 2 months         | 47.7      | 182.4 | 139.9         | 0.9  |
| 3 months         | 120.4     | 198.8 | 25.6          | 5.4  |
| 4 months         | 35.0      | 88.1  | 27.7          | 1.9  |
| 5 months         | 32.0      | 24.6  | 18.1          | 3.4  |
| 6 months         | 69.7      | 17.7  | 16.9          | 7.2  |
| 7 months         | 25.2      | 29.4  | 15.0          | 3.5  |
| 8 months         | 20.5      | 12.1  | 11.0          | 3.3  |
| 9 months         | 26.3      | 7.6   | 22.9          | 6.5  |
| 1 year           | 35.3      | 15.7  | 16.6          | 5.0  |
| 3 years 9 months | 42.1      | 34.9  | 18.4          | 6.9  |

Unit U/mL/3hours. Limit of detection 0.1
