# Supplementary material
Source: PubMed Central journal article supplement (PMC6703245)
Supplement: Supp_Table13.pdf [file Supp_Table13.pdf]

**Supplementary Table S13. Peripheral T-cell responses against capsids and transgene.**

| Animal | DMSO<br>-<br>control | AAV9 A | AAV9 B | AAV9 C | AAV8 A | AAV8 B | AAV8 C | hIDUA<br>A | hIDUA<br>B | hIDUA<br>C | PHA +<br>control |
|--------|----------------------|--------|--------|--------|--------|--------|--------|------------|------------|------------|------------------|
| #1     | 38                   | 28     | 83     | 40     | 93     | 103    | 103    | 53         | <b>165</b> | 58         | TNTC             |
| #2     | 60*                  | 55     | 53     | 43     | 103    | 170    | 113    | 175        | 120        | 190        | TNTC             |
| #3     | 68*                  | 20     | 50     | 33     | 20     | 30     | 35     | 98         | 38         | 73         | 688              |
| #4     | 8                    | 10     | 13     | 10     | 15     | 13     | 3      | 5          | 8          | 5          | TNCT             |

Numbers indicate the number of spot forming units per  $10^6$  cells.

\* Negative control >55: data not interpretable. Positive results (> threefold DMSO background value) are indicated in bold red letters.
